# Supplementary material
Source: PubMed Central journal article supplement (PMC7001488)
Supplement: jmm-66-1635-s001.pdf [file jmm-66-1635-s001.pdf]

***Streptococcus gordonii* pheromone s.g.cAM373 may influence the reservoir of antibiotic resistance determinants of *Enterococcus faecalis* origin in the oral metagenome**

by

J. M. Mansfield, P. Herrmann, A. M. Jesionowski, M. M. Vickerman

Supplemental Material

Table S1. Bacterial strains used in this study.

| Bacterial strain*                       | Relevant phenotype†                                                                             | Source or reference                  |
|-----------------------------------------|-------------------------------------------------------------------------------------------------|--------------------------------------|
| <i>S. gordonii</i> CH1                  | strain Challis parent; ComCDE-positive, s.g.cAM373-positive                                     | 1                                    |
| <i>S. gordonii</i> CH1-S                | spontaneous derivative of CH1 Sm <sup>R</sup> ;                                                 | 2                                    |
| <i>S. gordonii</i> CH1811               | s.g.cAM373-negative                                                                             | 3                                    |
| <i>S. gordonii</i> CH1811-S             | s.g.cAM373-negative, Sm <sup>R</sup>                                                            | This study                           |
| <i>S. gordonii</i> CH9278               | ΔcomCDE mutant of CH1, Sp <sup>R</sup> ;<br>s.g.cAM373-positive                                 | This study                           |
| <i>S. sanguinis</i> SK36                |                                                                                                 | 4                                    |
| <i>S. sanguinis</i> SK36-S              | Sm <sup>R</sup>                                                                                 | This study                           |
| <i>S. anginosus</i> ATCC 33397          |                                                                                                 | ATCC                                 |
| <i>S. anginosus</i> ATCC 33397-S        | Sm <sup>R</sup>                                                                                 | This study                           |
| <i>S. mutans</i> ATCC 25175             |                                                                                                 | ATCC                                 |
| <i>S. mutans</i> ATCC 25175-S           | Sm <sup>R</sup>                                                                                 | S. Flannagan, University of Michigan |
| <i>S. suis</i> ATCC 43765               |                                                                                                 | ATCC                                 |
| <i>S. suis</i> ATCC 43765-S             | Sm <sup>R</sup>                                                                                 | This study                           |
| <i>E. faecalis</i> OG1X/pAM373          | Sm <sup>R</sup> responder                                                                       | 5                                    |
| <i>E. faecalis</i> OG1X/pAM4020         | Sm <sup>R</sup> Em <sup>R</sup> ; pAM373 with Em <sup>R</sup> Tn917lac insert; responder        | 5                                    |
| <i>E. faecalis</i> JH2-2/pAM378         | Rf <sup>R</sup> Fa <sup>R</sup> ; pAM373 with Tc <sup>R</sup> Tn918 insert; responder           | 6                                    |
| <i>E. faecalis</i> JH2-2/pAM378/pAMS470 | Rf <sup>R</sup> Fa <sup>R</sup> Tc <sup>R</sup> Em <sup>R</sup> donor                           | 3                                    |
| JH2-2/pAMS470                           | Rf <sup>R</sup> Fa <sup>R</sup> Em <sup>R</sup> filter mating control; not pheromone responsive | 3                                    |

\* Streptococcal strains designated -S were selected for spontaneous resistance to streptomycin

(Sm) by passage and growth on Todd Hewitt agar with increasingly higher concentrations of

antibiotic. Restriction enzyme digestion fragment lengths and 16S rDNA sequence comparisons were done to confirm that spontaneous Sm-resistant strains were each derived from the respective parent strain.

† Antibiotic resistance levels for maintenance and/or selection were: 25 µg rifampicin (Rf) ml<sup>-1</sup>, and 25 µg fusidic acid (Fa) ml<sup>-1</sup> for *E. faecalis* JH2-2 chromosomal markers, 1000 µg Sm ml<sup>-1</sup> for OG1X and streptococcal chromosomal markers and 125 µg spectinomycin (Sp) ml<sup>-1</sup> for CH9278 chromosomal marker, 10 µg tetracycline (Tc) ml<sup>-1</sup> for the pAM373-derivative pAM378, 5 µg erythromycin (Em) ml<sup>-1</sup> and 10 µg Em ml<sup>-1</sup> for the enterococcal/streptococcal replicative plasmid, pAMS470, and the pAM373-derivative, pAM4020, respectively.

## Supplemental Method

### Construction of *S. gordonii* strain CH9278

To control for the role of competence in DNA uptake during filter matings, a *comCDE*-deficient mutant strain was constructed in *S. gordonii* by allelic replacement. A 458-bp region of the CH1 chromosome encoding the region upstream of the *comCDE* promoter was amplified by PCR with primers (engineered restriction digest sites underlined) Xho2149F (5'ATCTCGAGCTATTGAAGGTCAGCAATTTCC3') and EcoComCR (5'ATGAATTCGCTTCATATGCAAGTAAATATAACTG3'); a 320-bp CH1 chromosomal region encoding the 5-prime end of *comE* and the downstream chromosomal region was amplified with Bam2145F (5'ATGGATCCAGAGATATTCTATATATTGAGACGAC3') and Sst2145R (5'ATGAGCTCAGTTTTATCTCGCTTTGTCAACAG3'). The resulting amplicons were purified by agarose electrophoresis, eluted (Qiagen), digested, and cloned into compatible restriction sites located upstream and downstream, respectively, of the *aad9* gene encoding spectinomycin resistance [7] in pGEM-7SpR [8] using *E. coli* DH5α (Stratagene) cloning strain grown in Luria-Bertani medium incubated aerobically at 37 °C. After confirmation of nucleotide sequence fidelity, the resulting plasmid was digested with *Xho*I and *Sst*I, and the released 1936-bp

double-stranded DNA fragment was transformed into serum-competent strain CH1 cells [2] and selected for growth on spectinomycin agar. A selected transformant, strain CH9278, had the chromosomally integrated *aad9* gene replacing the *comCDE* promoter, *comC* and *comD* structural genes and the DNA encoding the first 167 amino acids of ComE as confirmed by sequence analysis.

**Figure S1.** Donor and transconjugant plasmid analysis.

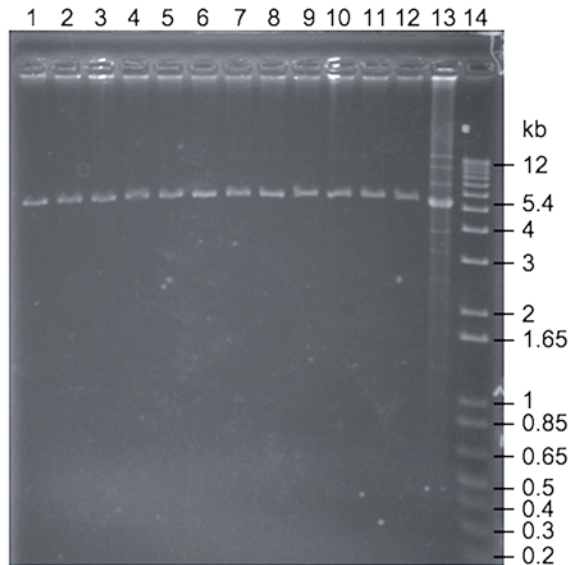

*Hind*III-digested plasmid DNA from JH2-2/pAM378/pAMS470 donors (lane 13) and two randomly-chosen putative transconjugants from an independent mating with each recipient species. Lanes: 1-2 *S. gordonii* CH1-S; 3-4 *S. gordonii* CH9278; 5-6 *S. sanguinis* SK36-S; 7-8 *S. anginosus* ATCC 33397-S; 9-10 *S. mutans* ATCC 25175-S; 11-12 *S. suis* ATCC 43765-S. Lane 14: DNA size ladder (Thermo Fisher Scientific Waltham, MA). Expected sizes based upon nucleotide sequence analysis and individual *Hind*III-digested plasmid preparations from JH2-2/pAM378 and JH2-2/pAMS470 (data not shown) are pAM378: 13, 10, 6.9, 6.8, 5.5, 3.9, 3.2, 2.5, 1.3, and 0.6 kb; pAMS470: 5.4 kb.

**Figure S2.**

| Accession Number          | Aligned Deduced Amino Acid Sequences                                                          |
|---------------------------|-----------------------------------------------------------------------------------------------|
| WP_012000638 <sup>a</sup> | MKKIYTLALLVFS <b>SVFILAA</b> CSSQEAWLNGTWKGEKNKKTYVFEEKQGWITILNGKEKIAE                        |
| WP_048774577 <sup>b</sup> | MKKIYTLALLVFS <b>SVFILAA</b> CSSQEAWLNGTWKGEKNKKTYVFEEKQGWITILNGKEKIAE                        |
| WP_045503232 <sup>c</sup> | MKKIYTLALLVFS <b>SVFILAA</b> CSSQEAWLNGTWKGEKNKKTYVFEEKQGWITILNGKEKLAE                        |
| WP_061410676 <sup>d</sup> | MKKIYTLALLVFS <b>SVFILAA</b> CSSQEAWLNGTWKSEKTKDTYVFEEKQGWITILNGKEKIAE                        |
| WP_060970353 <sup>e</sup> | MKKIYTLALLVFS <b>SVFILAA</b> CSSQEAWLNGTWKSEKTKSTYVFEEKQGWITILNGKEKIAE                        |
| WP_060553535 <sup>f</sup> | MKKIYTLALLVFS <b>SVFILAA</b> CSSQEAWLNGTWKSEKTKGTYVFEEKQGWITILNGKEKIAE<br>***** ** * ***** ** |
| WP_012000638              | KGEVKDKKGDQFSIVDANGNRHQIKKVDENTIEYQPFTSDGISATNGESFKFKKDK                                      |
| WP_048774577              | KGEVKDKKGDQFSIVDANGNRHQIKKVDENTIEYQPFTSDGISATNGESFKFKKKNK                                     |
| WP_045503232              | KGEVKDKKGDQFSIVDANGNRHQIKKVDENTIEYQPFTSDGISATNGESFKFKKDK                                      |
| WP_061410676              | KGEVKDKKGDQFSIVDANGNRHQIKKVDENTIEYQFTSDGISATNGESFKFKKEK                                       |
| WP_060970353              | KGEVKDKKGDQFTIVDANGNRHQIKKVDENTIEYQSFTSDGISATNGESFKFKKDK                                      |
| WP_060553535              | KGEVKDKKGDQFTIVDTNGNRHQIKKVDENTIEYQPFTSDGISATNGESFKFKKDK<br>***** ** * ***** **               |

**Comparison of CamG like proteins by multiple sequence alignment.** CamG-like proteins were identified in multiple oral streptococcal strains by a BlastP search [9] of NCBI databases (as of June 22, 2017). Entries that encoded proteins with amino acid sequences identical to s.g.cAM373 in their signal sequences (bold font) located immediately upstream of the cysteine lipoprotein cleavage site were aligned by CLUSTAL omega [10]. Conserved amino acids are represented by an asterisk.

Strains included in each accession number are noted by a superscript letter as follows:

<sup>a</sup>*S. gordonii* strain CH1, FDAARGOS\_257

<sup>b</sup>*S. cristatus* strain 771SOLI; *S. gordonii* strains FSS2, MW10, and PV40

<sup>c</sup>*S. gordonii* strain G9B

<sup>d</sup>*S. gordonii* strain DD07

<sup>e</sup>*S. gordonii* strains Blackburn and FSS8; *S. sp.* CCH8-G7

<sup>f</sup>*S. gordonii* strains ATCC10558, CCUG33482, and Channon

## References for Supplemental Material.

1. **Sulavik MC, Tardif G, Clewell DB.** Identification of a gene, *rgg*, which regulates expression of glucosyltransferase and influences the Spp phenotype of *Streptococcus gordonii* Challis. *J Bacteriol* 1992;174:3577–3586.
2. **Vickerman MM, Heath DG, Clewell DB.** Construction of recombination-deficient strains of *Streptococcus gordonii* by disruption of the *recA* gene. *J Bacteriol* 1993;175:6354–6357.
3. **Vickerman MM, Flannagan SE, Jesionowski AM, Brossard KA, Clewell DB, et al.** A genetic determinant in *Streptococcus gordonii* Challis encodes a peptide with activity similar to that of enterococcal sex pheromone cAM373 which facilitates intergeneric DNA transfer. *J Bacteriol* 2010;192:2535-2545.
4. **Hsu SD, Cisar JO, Sandberg AL, Kilian M.** Adhesive properties of viridans group streptococcal species. *Microb Ecol Health Dis* 1994;7:125-137.
5. **De Boever EH, Clewell DB, Fraser CM.** *Enterococcus faecalis* conjugative plasmid pAM373: complete nucleotide sequence and genetic analyses of sex pheromone response. *Mol Microbiol* 2000;37:1327–1341.
6. **Clewell DB, An FY, White BA, Gawron-Burke C.** *Streptococcus faecalis* sex pheromone (cAM373) also produced by *Staphylococcus aureus* and identification of a conjugative transposon (Tn918). *J Bacteriol* 1985;162:1212–1220.

7. **Leblanc DJ, Lee LN, Inamine JM.** Cloning and nucleotide base sequence-analysis of a spectinomycin adenylyltransferase *aad9* determinant from *Enterococcus faecalis*. *Antimicrob Agents Chemother* 1991;35:1804-1810.
  
8. **Petersen HJ, Keane C, Jenkinson HF, Vickerman MM, Jesionowski A, et al.** Human platelets recognize a novel surface protein PadA on *Streptococcus gordonii* through a unique interaction involving fibrinogen receptor GPIIb/IIIa. *Infect Immun* 2010;78:413-422.
  
9. **Altschul SF, Gish W, Miller W, Myers EW, Lipman DJ.** Basic local alignment search tool. *J Mol Biol* 1990;215:403–410.
  
10. **Sievers F, Wilm A, Dineen DG, Gibson TJ, Karplus K, et al.** Fast, scalable generation of high-quality protein multiple sequence alignments using Clustal Omega. *Mol Syst Biol* 2011;7:539. doi:10.1038/msb.2011.75.
